# Supplementary material for: A 3D-microtissue-based phenotypic screening of radiation resistant tumor cells with synchronized chemotherapeutic treatment
Source: PubMed Central journal article supplement (PMC4460881; doi:10.1186/s12885-015-1481-9), 2015-06-10

**A**

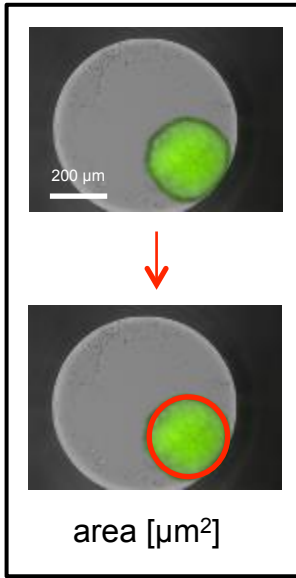

**B**

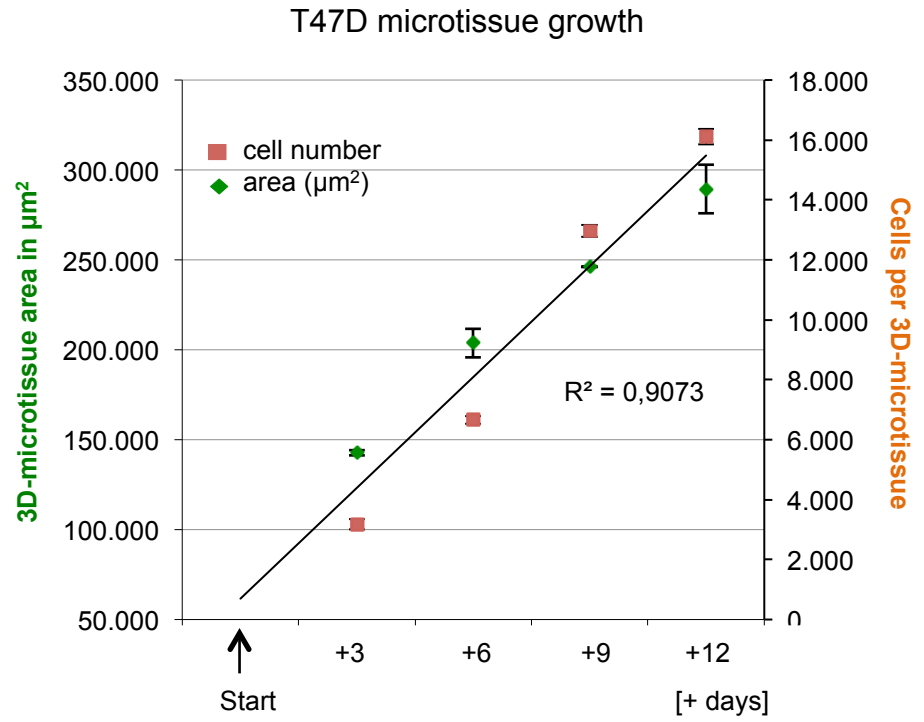

**C**

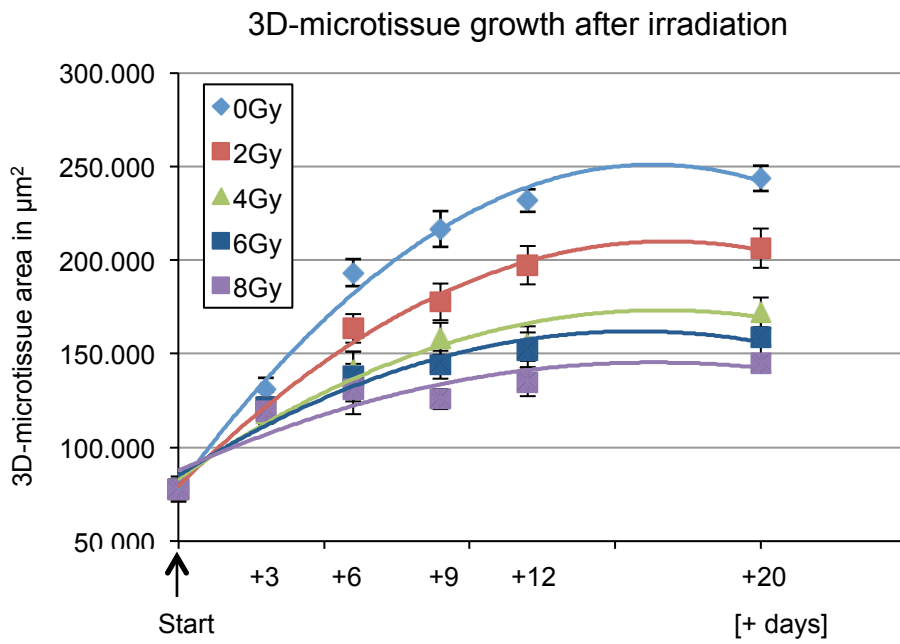

Supplement: 12885_2015_1481_MOESM1_ESM.pdf [file 12885_2015_1481_MOESM1_ESM.pdf]
