# Supplementary material for: A 3D-microtissue-based phenotypic screening of radiation resistant tumor cells with synchronized chemotherapeutic treatment
Source: Springer Nature journal article supplement (doi:10.1186/s12885-015-1481-9), 2015-06-10

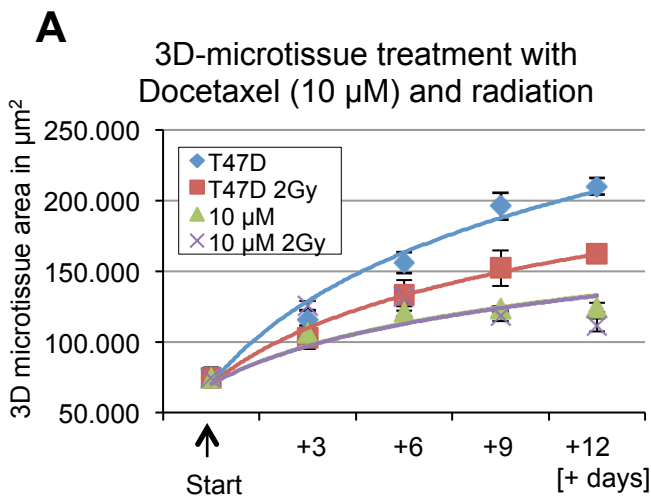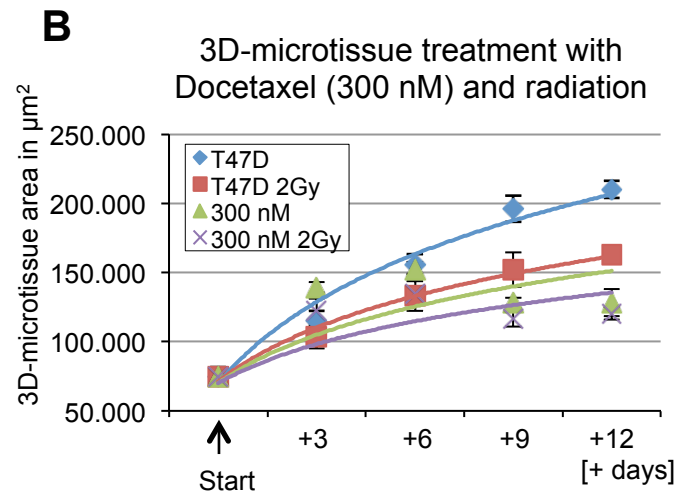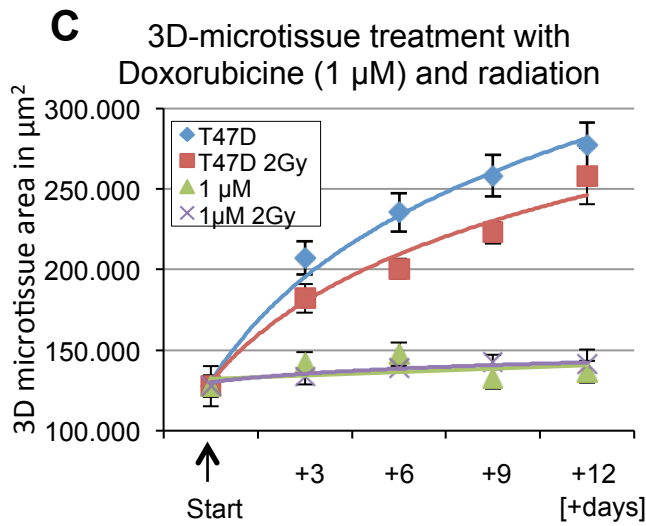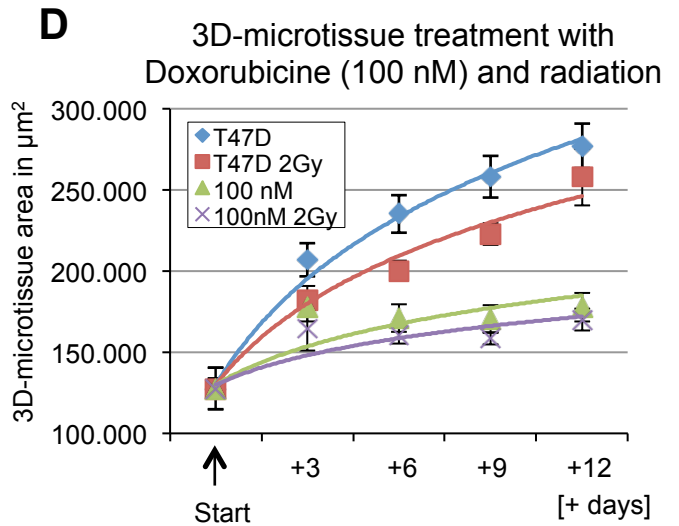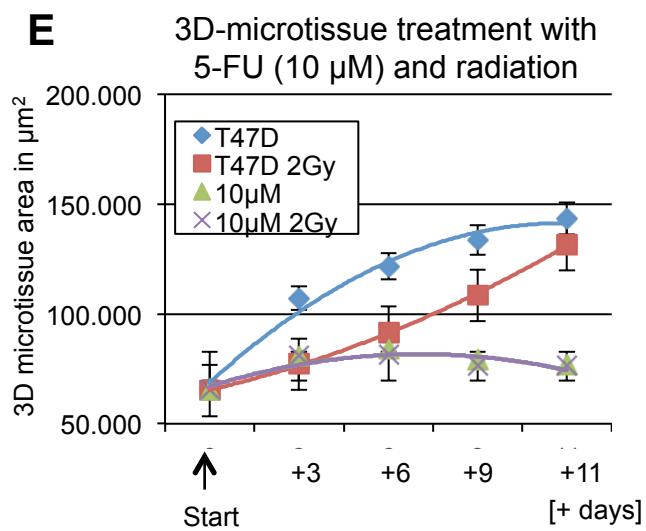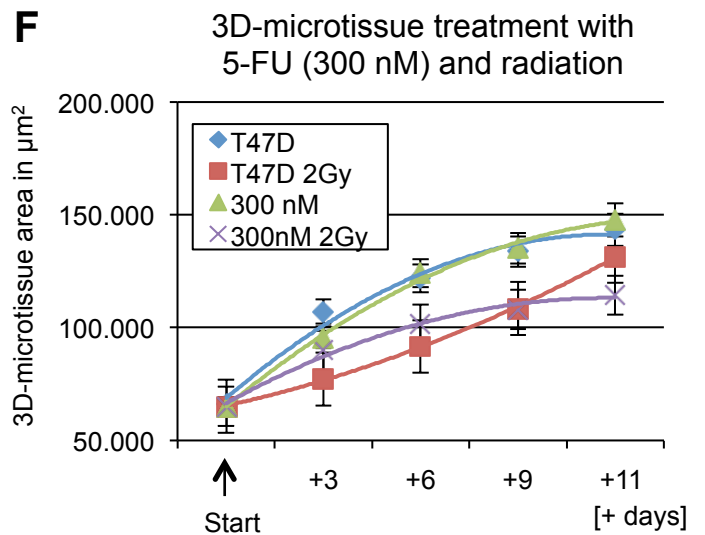

Supplement: MOESM3 [file 9744744]
